# Supplementary material for: Phytochemistry, Bioactivities and Traditional Uses of Michelia × alba
Source: MDPI journal article supplement (doi:10.3390/molecules27113450), 2022-05-26
Supplement: s1 [file s1]

**The constituents identified from the essential oil (EO) extracted from flower (F), leaves (L) and stem (S) of *Michelia alba***

| Class       | Constituents        | Chemical structure                                                                   | F | L | S | Types of EO                              | Reference                                                                        |
|-------------|---------------------|--------------------------------------------------------------------------------------|---|---|---|------------------------------------------|----------------------------------------------------------------------------------|
| Monoterpene | 1. camphene         | 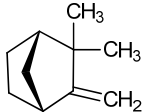   | / | / | / | steam distillation                       | (Bi-yao and Dan, 1982; Huang <i>et al.</i> , 2009a; Huang <i>et al.</i> , 2009b) |
|             | 2. camphor          |    | / |   |   | Thai China Flavors & Fragrances Co., Ltd | (Songsamoe <i>et al.</i> , 2017)                                                 |
|             | 3. (+)-2-bornanone  |    |   | / | / | steam distillation                       | (Huang <i>et al.</i> , 2009a)                                                    |
|             | 4. borneol          |   | / | / | / | steam distillation                       | (Huang <i>et al.</i> , 2009a; Huang <i>et al.</i> , 2009b)                       |
|             | 5. borneol, acetate |  |   | / | / | steam distillation                       | (Huang <i>et al.</i> , 2009a)                                                    |

|                              |                                                                                      |   |   |   |                                          |                                                                                                                         |
|------------------------------|--------------------------------------------------------------------------------------|---|---|---|------------------------------------------|-------------------------------------------------------------------------------------------------------------------------|
| 6. 3-carene                  | 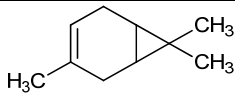   | / |   |   | steam distillation                       | (Bi-yao and Dan, 1982)                                                                                                  |
| 7. trans-carveol             |    | / |   |   | steam distillation                       | (Bi-yao and Dan, 1982)                                                                                                  |
| 8. cis-citral                |    |   | / | / | steam distillation                       | (Huang <i>et al.</i> , 2009a)                                                                                           |
| 9. trans-citral              |    |   | / | / | steam distillation                       | (Huang <i>et al.</i> , 2009a)                                                                                           |
| 10. eucalyptol / 1,8-cineole |    | / | / | / | steam distillation                       | (Huang <i>et al.</i> , 2009a)<br>(Bi-yao and Dan, 1982;<br>Huang <i>et al.</i> , 2009a;<br>Huang <i>et al.</i> , 2009b) |
| 11. α-fenchene               |  | / | / |   | steam distillation                       | (Huang <i>et al.</i> , 2009b)                                                                                           |
| 12. (R)-fenchone             |  | / |   |   | Thai China Flavors & Fragrances Co., Ltd | (Songsamoe <i>et al.</i> , 2017)                                                                                        |

|                                        |                                                                                      |   |   |                                          |                                                            |
|----------------------------------------|--------------------------------------------------------------------------------------|---|---|------------------------------------------|------------------------------------------------------------|
| 13. geranyl acetate                    | 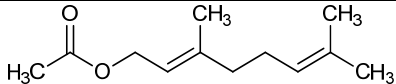   | / | / | steam distillation                       | (Huang <i>et al.</i> , 2009b)                              |
| 14. (2Z,6Z)-octa-2,6-dien-1-yl acetate |    | / | / | steam distillation                       | (Huang <i>et al.</i> , 2009a; Huang <i>et al.</i> , 2009b) |
| 15. <i>cis</i> -geraniol               |    | / | / | steam distillation                       | (Huang <i>et al.</i> , 2009a; Huang <i>et al.</i> , 2009b) |
| 16. <i>trans</i> -geraniol             |    | / | / | steam distillation                       | (Huang <i>et al.</i> , 2009a; Huang <i>et al.</i> , 2009b) |
| 17. methyl geranate                    |    | / | / | steam distillation                       | (Huang <i>et al.</i> , 2009a)                              |
| 18. $\alpha$ -limonene diepoxide       |    | / | / | steam distillation                       | (Huang <i>et al.</i> , 2009a)                              |
| 19. (S)-limonene                       |   | / | / | Thai China Flavors & Fragrances Co., Ltd | (Songsamoe <i>et al.</i> , 2017)                           |
| 20. limonene                           |  | / | / | steam distillation                       | (Bi-yao and Dan, 1982)                                     |
| 21. epoxylinalool                      |  | / | / | hexane extraction,                       | (Pensuk <i>et al.</i> , 2007; Huang <i>et al.</i> ,        |

|                          |                                                                                      |   |   |   |  |                    |                                                                                                                                               |
|--------------------------|--------------------------------------------------------------------------------------|---|---|---|--|--------------------|-----------------------------------------------------------------------------------------------------------------------------------------------|
|                          |                                                                                      |   |   |   |  | steam distillation | 2009a; Huang <i>et al.</i> , 2009b)                                                                                                           |
| 22. limonene oxide       | 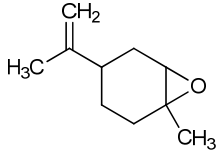   | / | / |   |  | steam distillation | (Huang <i>et al.</i> , 2009b)                                                                                                                 |
| 23. cis-linalool oxide   |    | / | / |   |  | steam distillation | (Bi-yao and Dan, 1982; Pensuk <i>et al.</i> , 2007; Huang <i>et al.</i> , 2009a; Huang <i>et al.</i> , 2009b)                                 |
| 24. trans-linalool oxide |    | / | / | / |  | steam distillation | (Bi-yao and Dan, 1982; Pensuk <i>et al.</i> , 2007; Huang <i>et al.</i> , 2009a; Huang <i>et al.</i> , 2009b)                                 |
| 25. linalool             |  | / | / | / |  | steam distillation | (Bi-yao and Dan, 1982; Pensuk <i>et al.</i> , 2007; Huang <i>et al.</i> , 2009a; Huang <i>et al.</i> , 2009b; Songsamoe <i>et al.</i> , 2017) |

|                                 |                                                                                      |   |   |   |                                        |                                                               |
|---------------------------------|--------------------------------------------------------------------------------------|---|---|---|----------------------------------------|---------------------------------------------------------------|
| 26. 8-hydroxy linalool          | 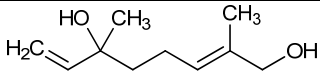   |   |   | / | steam distillation                     | (Huang <i>et al.</i> , 2009a)                                 |
| 27. cis-p-2,8-menthadien-1-ol   |    |   |   | / | steam distillation                     | (Huang <i>et al.</i> , 2009a)                                 |
| 28. α-myrcene                   |    | / | / |   |                                        | (Huang <i>et al.</i> , 2009b; Songsamoe <i>et al.</i> , 2017) |
| 29. β-myrcene                   |    | / | / | / | steam distillation                     | (Bi-yao and Dan, 1982; Huang <i>et al.</i> , 2009a)           |
| 30. nopol                       |    |   | / |   | steam distillation                     | (Huang <i>et al.</i> , 2009b)                                 |
| 31. cis-ocimene / (Z)- ocimene  |   | / |   |   | steam distillation , hexane extraction | (Pensuk <i>et al.</i> , 2007)                                 |
|                                 |                                                                                      |   | / | / | steam distillation                     | (Huang <i>et al.</i> , 2009a)                                 |
| 32. trans-ocimene / (E)-ocimene |  | / |   |   | steam distillation , hexane extraction | (Pensuk <i>et al.</i> , 2007)                                 |

|                         |                                                                                      |   |   |   |   |                    |                                                            |
|-------------------------|--------------------------------------------------------------------------------------|---|---|---|---|--------------------|------------------------------------------------------------|
|                         |                                                                                      |   | / | / | / | steam distillation | (Huang <i>et al.</i> , 2009a; Huang <i>et al.</i> , 2009b) |
| 33. phellandrene        | 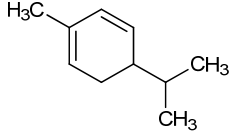   | / |   |   |   | steam distillation | (Bi-yao and Dan, 1982)                                     |
| 34. $\alpha$ -pinene    |    | / | / | / |   | steam distillation | (Huang <i>et al.</i> , 2009a; Huang <i>et al.</i> , 2009b) |
| 35. $\beta$ -pinene     |    | / | / | / |   | steam distillation | (Bi-yao and Dan, 1982; Huang <i>et al.</i> , 2009a)        |
| 36. pinen-3-one         |    |   |   | / |   | steam distillation | (Huang <i>et al.</i> , 2009a)                              |
| 37. (+)-sabinene        |   | / | / | / |   | steam distillation | (Huang <i>et al.</i> , 2009a; Huang <i>et al.</i> , 2009b) |
| 38. $\gamma$ -terpinene |  | / |   |   |   | steam distillation | (Huang <i>et al.</i> , 2009b)                              |

|               |                                    |                                                                                      |   |   |   |                    |                                                            |
|---------------|------------------------------------|--------------------------------------------------------------------------------------|---|---|---|--------------------|------------------------------------------------------------|
|               | 39. $\alpha$ -terpineol            | 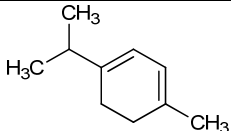   |   | / |   | steam distillation | (Huang <i>et al.</i> , 2009b)                              |
|               | 40. cis- $\beta$ -terpineol        |    | / | / |   | steam distillation | (Huang <i>et al.</i> , 2009b)                              |
|               | 41. 4-terpineol                    |    | / | / | / | steam distillation | (Huang <i>et al.</i> , 2009a; Huang <i>et al.</i> , 2009b) |
|               | 42. 2,3,3- trimethyl-2-norbornanol |    | / | / |   | steam distillation | (Huang <i>et al.</i> , 2009b)                              |
| sesquiterpene | 43. $\alpha$ -cadinol              |    |   | / | / | steam distillation | (Huang <i>et al.</i> , 2009a)                              |
|               | 44. T-cadinol                      |   |   |   | / | steam distillation | (Huang <i>et al.</i> , 2009a)                              |
|               | 45. aromadendrene                  |  |   | / | / | steam distillation | (Huang <i>et al.</i> , 2009a; Huang <i>et al.</i> , 2009b) |

|                                                                   |                                                                                      |   |   |   |                    |                                                            |
|-------------------------------------------------------------------|--------------------------------------------------------------------------------------|---|---|---|--------------------|------------------------------------------------------------|
| 46. (-)-isoaromadendrene                                          | 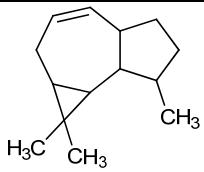   | / |   |   | steam distillation | (Huang <i>et al.</i> , 2009b)                              |
| 47. isoaromadendrene epoxide                                      |    | / | / | / | steam distillation | (Huang <i>et al.</i> , 2009a; Huang <i>et al.</i> , 2009b) |
| 48. decahydro-1,1,7-trimethyl-4-methylene-1 H-cycloprop[e]azulene |    | / |   |   | steam distillation | (Huang <i>et al.</i> , 2009b)                              |
| 49. aristolene                                                    |    | / |   |   | steam distillation | (Bi-yao and Dan, 1982)                                     |
| 50. β-bisabolene                                                  |   | / |   | / | steam distillation | (Bi-yao and Dan, 1982; Huang <i>et al.</i> , 2009a)        |
| 51. trans-Z-α -bisabolene epoxide                                 |  |   | / | / | steam distillation | (Huang <i>et al.</i> , 2009a)                              |



|                                 |                                                                                     |   |   |   |                    |                               |
|---------------------------------|-------------------------------------------------------------------------------------|---|---|---|--------------------|-------------------------------|
| 52. $\alpha$ -cadinene          | 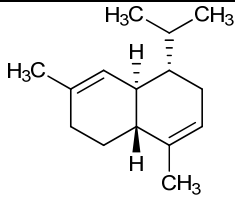  | / | / |   | steam distillation | (Huang <i>et al.</i> , 2009b) |
| 53. $\delta$ -cadinene          |   | / |   |   | steam distillation | (Bi-yao and Dan, 1982)        |
| 54. (+)- $\delta$ -cadinene     |   |   | / | / | steam distillation | (Huang <i>et al.</i> , 2009a) |
| 55. $1\alpha$ -cadin-4-en-10-ol |   |   | / |   | steam distillation | (Huang <i>et al.</i> , 2009b) |
| 56. trans-caryophyllene         |  | / |   |   | steam distillation | (Pensuk <i>et al.</i> , 2007) |

|                         |                                                                                      |   |   |   |                    |                                                            |
|-------------------------|--------------------------------------------------------------------------------------|---|---|---|--------------------|------------------------------------------------------------|
| 57. cis-caryophyllene   | 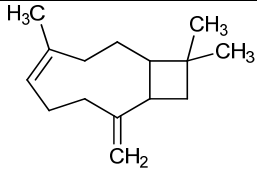   | / |   |   | steam distillation | (Bi-yao and Dan, 1982)                                     |
| 58. caryophyllene oxide |    | / | / | / | steam distillation | (Huang <i>et al.</i> , 2009a; Huang <i>et al.</i> , 2009b) |
| 59. α-chamigrene        |    | / | / |   | steam distillation | (Huang <i>et al.</i> , 2009b)                              |
| 60. β-chamigrene        |    |   | / | / |                    | (Huang <i>et al.</i> , 2009a)                              |
| 61. copaene             |   |   | / | / | steam distillation | (Huang <i>et al.</i> , 2009a; Huang <i>et al.</i> , 2009b) |
| 62. α-copaen-11-ol      |  | / | / | / | steam distillation | (Huang <i>et al.</i> , 2009a; Huang <i>et al.</i> , 2009b) |

|                          |                                                                                      |   |   |   |                    |                                                                                   |
|--------------------------|--------------------------------------------------------------------------------------|---|---|---|--------------------|-----------------------------------------------------------------------------------|
| 63. $\alpha$ -cubebene   | 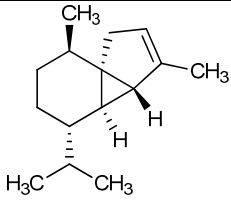   | / | / | / | steam distillation | (Bi-yao and Dan, 1982; Huang <i>et al.</i> , 2009a; Huang <i>et al.</i> , 2009b)  |
| 64. $\beta$ -cubebene    |    | / | / | / | steam distillation | (Huang <i>et al.</i> , 2009a) (Bi-yao and Dan, 1982; Huang <i>et al.</i> , 2009a) |
| 65. cubenol              |    | / | / | / | steam distillation | (Bi-yao and Dan, 1982; Huang <i>et al.</i> , 2009a; Huang <i>et al.</i> , 2009b)  |
| 66. eudesm-7(11)-en-4-ol |   | / | / | / | steam distillation | (Huang <i>et al.</i> , 2009a; Huang <i>et al.</i> , 2009b)                        |
| 67. $\beta$ -elemene     |  | / | / | / | steam distillation | (Huang <i>et al.</i> , 2009b)                                                     |
| 68. $\delta$ -elemene    |  | / | / | / | steam distillation | (Huang <i>et al.</i> , 2009b)                                                     |

|                                         |                                                                                      |   |   |   |                    |                                                            |
|-----------------------------------------|--------------------------------------------------------------------------------------|---|---|---|--------------------|------------------------------------------------------------|
| 69. epiglobulol                         | 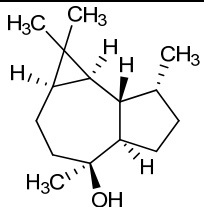   | / | / | / | steam distillation | (Huang <i>et al.</i> , 2009a; Huang <i>et al.</i> , 2009b) |
| 70. eremophila-1(10),11-diene           |    | / | / | / | steam distillation | (Huang <i>et al.</i> , 2009b)                              |
| 71. $\alpha$ -farnesene                 |    | / | / | / | steam distillation | (Huang <i>et al.</i> , 2009b)                              |
| 72. <i>E</i> -farnesene epoxide         |    | / | / | / | steam distillation | (Huang <i>et al.</i> , 2009a; Huang <i>et al.</i> , 2009b) |
| 73. (2 <i>Z</i> , 6 <i>E</i> )-farnesol |    | / | / | / | steam distillation | (Huang <i>et al.</i> , 2009b)                              |
| 74. (2 <i>E</i> , 6 <i>E</i> )-farnesol |   | / | / | / | steam distillation | (Huang <i>et al.</i> , 2009b)                              |
| 75. cis farnesol                        |  | / | / | / | steam distillation | (Huang <i>et al.</i> , 2009a)                              |
| 76. trans-farnesol                      |  | / | / | / | steam distillation | (Huang <i>et al.</i> , 2009a)                              |

|                                                    |                                                                                      |   |   |   |                                              |                                                                                               |
|----------------------------------------------------|--------------------------------------------------------------------------------------|---|---|---|----------------------------------------------|-----------------------------------------------------------------------------------------------|
| 77. germacrene D                                   | 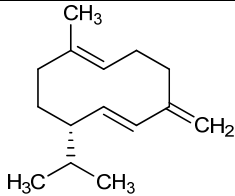   | / | / | / | steam distillation<br>,<br>enfleurage method | (Pensuk <i>et al.</i> , 2007;<br>Huang <i>et al.</i> , 2009a;<br>Huang <i>et al.</i> , 2009b) |
| 78. 8-isopropenyl-1,5-dimethyl-cyclodeca-1,5-diene |    | / | / | / | steam distillation                           | (Huang <i>et al.</i> , 2009a;<br>Huang <i>et al.</i> , 2009b)                                 |
| 79. α-humulene                                     |    | / | / | / | steam distillation                           | (Huang <i>et al.</i> , 2009a;<br>Huang <i>et al.</i> , 2009b)                                 |
| 80. isodene                                        |   | / | / | / | steam distillation                           | (Huang <i>et al.</i> , 2009a;<br>Huang <i>et al.</i> , 2009b)                                 |
| 81. ledene oxide-(II)                              |  | / | / | / | steam distillation                           | (Huang <i>et al.</i> , 2009a)                                                                 |
| 82. ledol                                          |  | / | / | / | steam distillation                           | (Huang <i>et al.</i> , 2009a;<br>Huang <i>et al.</i> , 2009b)                                 |

|                            |                                                                                      |   |   |   |                    |                                                            |
|----------------------------|--------------------------------------------------------------------------------------|---|---|---|--------------------|------------------------------------------------------------|
| 83. longipinocarvone       | 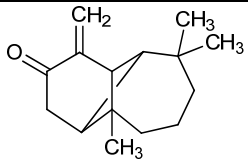   | / | / |   | steam distillation | (Huang <i>et al.</i> , 2009b)                              |
| 84. trans-longipinocarveol |    |   | / | / | steam distillation | (Huang <i>et al.</i> , 2009a)                              |
| 85. $\beta$ -muurolene     |    |   |   | / | steam distillation | (Huang <i>et al.</i> , 2009a)                              |
| 86. $\gamma$ -muurolene    |    |   |   | / | steam distillation | (Huang <i>et al.</i> , 2009a)                              |
| 87. T-muurolol             |   |   |   | / | steam distillation | (Huang <i>et al.</i> , 2009a)                              |
| 88. nerolidol              |  | / | / | / | steam distillation | (Huang <i>et al.</i> , 2009a; Huang <i>et al.</i> , 2009b) |

|                             |                                                                                      |   |   |   |                    |                                                            |
|-----------------------------|--------------------------------------------------------------------------------------|---|---|---|--------------------|------------------------------------------------------------|
| 89. (+)-sativene            | 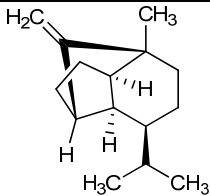   | / | / |   | steam distillation | (Huang <i>et al.</i> , 2009b)                              |
| 90. sativene                |    |   |   | / | steam distillation | (Huang <i>et al.</i> , 2009b)                              |
| 91. selina-6-en-4-ol        |    | / | / |   | steam distillation | (Huang <i>et al.</i> , 2009b)                              |
| 92. α-selinene              |    | / | / | / | steam distillation | (Huang <i>et al.</i> , 2009a; Huang <i>et al.</i> , 2009b) |
| 93. β-selinene              |   | / |   |   | steam distillation | (Bi-yao and Dan, 1982)                                     |
| 94. eudesma-4(14), 11-diene |  | / | / | / | steam distillation | (Huang <i>et al.</i> , 2009a; Huang <i>et al.</i> , 2009b) |

|                                                                  |                                                                                      |   |   |   |                    |                               |
|------------------------------------------------------------------|--------------------------------------------------------------------------------------|---|---|---|--------------------|-------------------------------|
| 95. spathulenol                                                  | 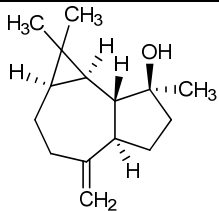   | / | / |   | steam distillation | (Huang <i>et al.</i> , 2009b) |
| 96. (-)-spathulenol                                              |    |   | / | / | steam distillation | (Huang <i>et al.</i> , 2009a) |
| 97. (+)-spathulenol                                              |    |   | / | / | steam distillation | (Huang <i>et al.</i> , 2009a) |
| 98. (5 <i>E</i> ,9 <i>E</i> )-12-methyl-1,5,9,11-tridecatetraene |    | / | / |   | steam distillation | (Huang <i>et al.</i> , 2009b) |
| 99. viridiflorol                                                 |   | / | / |   | steam distillation | (Huang <i>et al.</i> , 2009b) |
| 100. widdrol                                                     |  |   |   | / | steam distillation | (Huang <i>et al.</i> , 2009a) |



|                 |                                          |                                                                                      |   |   |   |                                      |                                                            |
|-----------------|------------------------------------------|--------------------------------------------------------------------------------------|---|---|---|--------------------------------------|------------------------------------------------------------|
|                 | 101. $\alpha$ -ylangene                  | 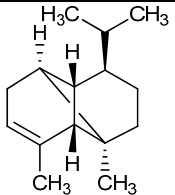   | / |   |   | steam distillation                   | (Bi-yao and Dan, 1982)                                     |
| Diterpene       | 102. phytol                              |    |   | / |   | steam distillation                   | (Huang <i>et al.</i> , 2009b)                              |
| Macro Diterpene | 103. $\beta$ -4,8,13-duvatriene-1,3-diol |    |   |   | / | steam distillation                   | (Huang <i>et al.</i> , 2009a)                              |
| fatty acid      | 104. benzenepropanoic acid, methyl ester |    | / |   |   | steam distillation                   | (Huang <i>et al.</i> , 2009b)                              |
|                 | 105. 2-hydroxy-benzoic acid methyl ester |   |   | / | / | steam distillation                   | (Huang <i>et al.</i> , 2009a; Huang <i>et al.</i> , 2009b) |
|                 | 106. 2-methyl butanoic acid              |  | / |   |   | enfleurage method, hexane extraction | (Pensuk <i>et al.</i> , 2007)                              |

|                                                              |                                                                                      |   |   |                                                            |                                                                                   |
|--------------------------------------------------------------|--------------------------------------------------------------------------------------|---|---|------------------------------------------------------------|-----------------------------------------------------------------------------------|
| 107. 11,14,17-eicosatrienoic acid, methyl ester              | 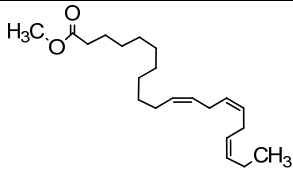   | / |   |                                                            |                                                                                   |
| 108. ethyl-2-methyl butyrate                                 |    | / |   | steam distillation , enflourage method,                    | (Pensuk <i>et al.</i> , 2007)                                                     |
| 109. methyl 2-methylbutyrate                                 |    | / |   | steam distillation , enflourage method, Water distillation | (Bi-yao and Dan, 1982) (Pensuk <i>et al.</i> , 2007; Punjee <i>et al.</i> , 2009) |
| 110. 2-methylbutyl-2-methylbutyrate                          |    | / |   | enflourage method                                          | (Pensuk <i>et al.</i> , 2007)                                                     |
| 111. phenylethyl-2-methyl butyrate                           |   | / |   | enflourage method                                          | (Pensuk <i>et al.</i> , 2007)                                                     |
| 112. palmitic acid / hexadecanoic acid / n-hexadecanoic acid |  | / |   | enflourage method, steam distillation                      | (Pensuk <i>et al.</i> , 2007; Huang <i>et al.</i> , 2009b)                        |
|                                                              |                                                                                      | / |   | steam distillation                                         | (Huang <i>et al.</i> , 2009b)                                                     |
| 113. nonadecanoic acid                                       |  | / | / | steam distillation                                         | (Huang <i>et al.</i> , 2009a)                                                     |

|                         |                                              |                                                                                      |   |   |   |                                      |                                                                              |
|-------------------------|----------------------------------------------|--------------------------------------------------------------------------------------|---|---|---|--------------------------------------|------------------------------------------------------------------------------|
|                         | 114. linolenic acid, methyl ester            | 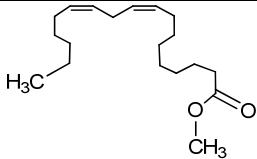   | / | / |   | steam distillation                   | (Huang <i>et al.</i> , 2009b)                                                |
|                         | 115. 9,12-octadecadienoic acid methyl ester  |    | / | / |   | steam distillation                   | (Huang <i>et al.</i> , 2009b)                                                |
| Fatty acid methyl ester | 116. 13-docosenoic acid methyl ester         |    |   |   | / | steam distillation                   | (Huang <i>et al.</i> , 2009a)                                                |
| Alcohol                 | 117. phenylethyl alcohol                     |    | / |   |   | steam distillation                   | (Pensuk <i>et al.</i> , 2007)                                                |
|                         | 118. 2-octenol                               |    |   | / |   | steam distillation                   | (Huang <i>et al.</i> , 2009b)                                                |
|                         | 119. (9E,12E,15E)-9,12,15-octadecatrien-1-ol |    | / | / | / | steam distillation                   | (Huang <i>et al.</i> , 2009a; Huang <i>et al.</i> , 2009b)                   |
|                         | 120. 9,12,15-octadecatrien-1-ol              | Same as #95                                                                          | / | / |   | steam distillation                   | (Huang <i>et al.</i> , 2009b)                                                |
| allyl                   | 121. <i>p</i> -propenylanisole               |  |   | / | / | steam distillation                   | (Huang <i>et al.</i> , 2009a; Huang <i>et al.</i> , 2009b)                   |
| allylbenzene            | 122. eugenol                                 |  | / |   | / | steam distillation<br>, MeOH extract | (Bi-yao and Dan, 1982; Pensuk <i>et al.</i> , 2007; Lo <i>et al.</i> , 2010) |

|                        |                                                     |                                                                                      |   |   |   |                                          |                                                                                     |
|------------------------|-----------------------------------------------------|--------------------------------------------------------------------------------------|---|---|---|------------------------------------------|-------------------------------------------------------------------------------------|
| alkyl                  | 123. 2-undecanone                                   | 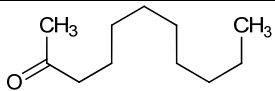   | / | / | / | steam distillation                       | (Huang <i>et al.</i> , 2009a; Huang <i>et al.</i> , 2009b)                          |
|                        | 124. 6,10-dimethyl-2-undecanone                     |    |   |   | / | steam distillation                       | (Huang <i>et al.</i> , 2009a)                                                       |
| alkane                 | 125. eicosane                                       |    |   | / | / | steam distillation                       | (Huang <i>et al.</i> , 2009a)                                                       |
| phenylpropanoid        | 126. $\alpha$ -asarone                              |    |   |   | / | steam distillation                       | (Huang <i>et al.</i> , 2009a)                                                       |
|                        | 127. methyl isoeugenol /<br>Isoeugenyl methyl ether |    | / |   |   | steam distillation                       | (Bi-yao and Dan, 1982)                                                              |
|                        |                                                     |                                                                                      | / | / | / | steam distillation                       | (Huang <i>et al.</i> , 2009a; Huang <i>et al.</i> , 2009b)                          |
|                        | 128. methyl eugenol /<br>eugenol methyl ether       |   | / | / |   | steam distillation                       | Bi-yao and Dan, 1982)<br>(Huang <i>et al.</i> , 2009a; Huang <i>et al.</i> , 2009b) |
|                        |                                                     |                                                                                      | / |   |   | hexane extraction                        | (Pensuk <i>et al.</i> , 2007)                                                       |
| polycyclic heteroarene | 129. indole (1H-indole)                             |  | / | / |   | enfleurage method,<br>steam distillation | (Pensuk <i>et al.</i> , 2007; Huang <i>et al.</i> , 2009b)                          |

|                                    |                                          |                                                                                      |   |   |   |                    |                                                            |
|------------------------------------|------------------------------------------|--------------------------------------------------------------------------------------|---|---|---|--------------------|------------------------------------------------------------|
| ester                              | 130. methyl benzoate                     | 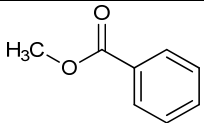   | / |   |   | hexane extraction  | (Pensuk <i>et al.</i> , 2007)                              |
|                                    | 131. phenyl-2-methyl benzoate            |    | / |   |   | hexane extraction  | (Pensuk <i>et al.</i> , 2007)                              |
|                                    | 132. acetic acid, 2-phenyl ethyl ester   |    | / |   |   | steam distillation | (Huang <i>et al.</i> , 2009b)                              |
|                                    | 133. propanoic acid, 2-phenylethyl ester |    | / |   |   | steam distillation | (Huang <i>et al.</i> , 2009b)                              |
| bicyclic aromatic organic compound | 134. phthalan /1,3-dihydroisobenzofuran  |    | / | / |   | steam distillation | (Huang <i>et al.</i> , 2009b)                              |
| Aldehyde                           | 135. butanal                             |    |   | / |   | steam distillation | (Huang <i>et al.</i> , 2009a)                              |
|                                    | 136. benzeneacetaldehyde                 |    |   |   | / | steam distillation | (Huang <i>et al.</i> , 2009a)                              |
|                                    | 137. octanal                             |   |   | / |   | steam distillation | (Huang <i>et al.</i> , 2009b)                              |
| Alkyl-Aldehyde                     | 138. pentanal                            |  |   | / |   | steam distillation | (Huang <i>et al.</i> , 2009a)                              |
| Hydrocarbon                        | 139. estragole                           |  | / | / | / | steam distillation | (Huang <i>et al.</i> , 2009a; Huang <i>et al.</i> , 2009b) |
|                                    | 140. <i>n</i> -heptacosane               |  | / | / |   |                    |                                                            |

|                |                                                                                                 |                                                                                      |   |   |  |                    |                               |
|----------------|-------------------------------------------------------------------------------------------------|--------------------------------------------------------------------------------------|---|---|--|--------------------|-------------------------------|
|                | 141. <i>n</i> -octacosane                                                                       | 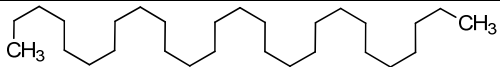   | / | / |  | steam distillation | (Huang <i>et al.</i> , 2009b) |
|                | 142. 1,5,5-trimethyl-6-methylene-1-cyclohexane                                                  |    | / |   |  | steam distillation | (Huang <i>et al.</i> , 2009b) |
|                | 143. <i>n</i> -pentadecane                                                                      |    | / | / |  | steam distillation | (Huang <i>et al.</i> , 2009b) |
|                | 144. 2,4-diisopropenyl-1-methyl-1-vinylcyclohexane                                              |    | / | / |  | steam distillation | (Huang <i>et al.</i> , 2009b) |
|                | 145. (2 $\alpha$ , 3 $\beta$ , 5 $\beta$ )-1,1,2-trimethyl-3,5-bis(1-methylethenyl)-cyclohexane |    | / |   |  | steam distillation | (Huang <i>et al.</i> , 2009b) |
| fatty alcohols | 146. (+,-)-nuciferol                                                                            |    | / |   |  | steam distillation | (Huang <i>et al.</i> , 2009b) |
| Bezene         | 147. 5-(2-propenyl)-1, 3-benzodioxole                                                           |  | / | / |  | steam distillation | (Huang <i>et al.</i> , 2009b) |
| Phenols        | 148. 2-methoxy-4-vinyl phenol                                                                   |  | / |   |  | steam distillation | (Huang <i>et al.</i> , 2009b) |
| Ketone         | 149. 1,2,3,5,6,7-hexahydro-inden-4-one                                                          |  |   | / |  | steam distillation | (Huang <i>et al.</i> , 2009b) |

|             |                                                  |                                                                                     |   |   |   |                    |                               |
|-------------|--------------------------------------------------|-------------------------------------------------------------------------------------|---|---|---|--------------------|-------------------------------|
| Monoterpene | 150. 2-(acetylmethyl)-(+)-3-carene               | 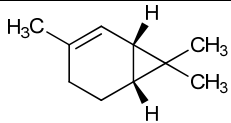  | / |   |   | steam distillation | (Huang <i>et al.</i> , 2009b) |
| Monoterpene | 151. 10-(acetylmethyl)-(+)-3-carene              |   |   | / | / | steam distillation | (Huang <i>et al.</i> , 2009a) |
| Monoterpene | 152. ocimenol                                    |   |   | / | / | steam distillation | (Huang <i>et al.</i> , 2009a) |
| Ester       | 153. 3-methyl-2-butenic acid, -phenylethyl ester |   |   | / | / | steam distillation | (Huang <i>et al.</i> , 2009a) |
| Ketone      | 154. 4-Camphenylbutan-2-one                      |   |   |   | / | steam distillation | (Huang <i>et al.</i> , 2009a) |
| Alcohol     | 155. Z,Z-8,10-Hexadecadien-1-ol                  |   |   |   | / | steam distillation | (Huang <i>et al.</i> , 2009a) |
| Alkane      | 156. 6-methyloctadecane                          |   |   |   | / | steam distillation | (Huang <i>et al.</i> , 2009a) |
| Diester     | 157. butyl octyl phthalate                       |  |   | / | / | steam distillation | (Huang <i>et al.</i> , 2009a) |
