# Supplementary material for: Phytochemistry, Bioactivities and Traditional Uses of Michelia × alba
Source: MDPI journal article supplement (doi:10.3390/molecules27113450), 2022-05-26
Supplement: s1 [file s1]

Supplementary Data S2: Constituents identified from the extracts of different plant part of *M. alba*

|            | Constituents            | Chemical structure                                                                   | F | L | S |
|------------|-------------------------|--------------------------------------------------------------------------------------|---|---|---|
| aporphines | 1. (-)-anonaïne         | 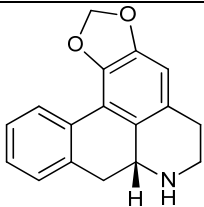  | / | / | / |
|            | 2. (-)-norushinsunine   |   | / | / | / |
|            | 3. (-)-ushinsunine      |   | / | / | / |
|            | 4. (-)-N-acetylanonaïne |  | / | / |   |

|               |                                  |                                                                                       |   |   |   |
|---------------|----------------------------------|---------------------------------------------------------------------------------------|---|---|---|
|               | 5. (-)- <i>N</i> -formylanonaine | 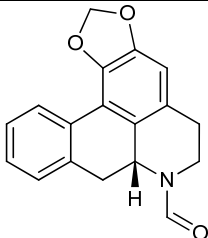   |   |   | / |
|               | 6. (-)-romerine                  |    |   |   | / |
|               | 7. (-)-asimilobine               |    |   |   | / |
| oxoaporphines | 8. Liriodenine                   |   | / | / | / |
|               | 9. Oxoxylopine                   |  |   | / | / |

|                        |                               |                                                                                       |   |  |  |
|------------------------|-------------------------------|---------------------------------------------------------------------------------------|---|--|--|
|                        | 10. atherospermidine          | 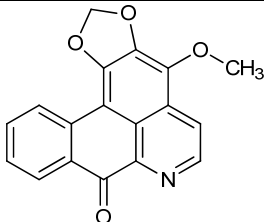   | / |  |  |
| 4,5-dioxoaporphine     | 11. michelaine                |    | / |  |  |
| sesquiterpene lactones | 12. michelenolide             |    | / |  |  |
|                        | 13. Costunolide               |   | / |  |  |
|                        | 14. 11,13-dehydrolanuginolide |  | / |  |  |

|            |                              |                                                                                       |   |   |   |
|------------|------------------------------|---------------------------------------------------------------------------------------|---|---|---|
| amide      | 15. N-trans-feruloyltyramine | 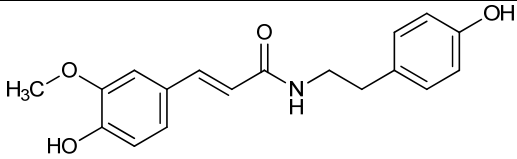   | / | / | / |
| lignan     | 16. (+)-syringaresinol       |    | / | / | / |
| benzenoids | 17. 4-hydroxybenzaldehyde    |    |   | / | / |
|            | 18. 4-hydroxybenzoic acid    |   |   | / |   |
|            | 19. methylparaben            |  |   | / |   |
|            | 20. p-anisaldehyde           |  |   |   | / |
|            | 21. veratraldehyde           |  |   |   | / |

|  |                                   |                                                                                       |   |  |   |
|--|-----------------------------------|---------------------------------------------------------------------------------------|---|--|---|
|  | 22. 3,4,5-trimethoxybenzoic acid  | 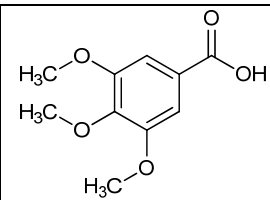   |   |  | / |
|  | 23. 3,4-dimethoxybenzoic acid     |    |   |  | / |
|  | 24. eugenol                       |    |   |  | / |
|  | 25. methyl isoeugenol             |    |   |  | / |
|  | 26. <i>p</i> -hydroxybenzaldehyde |    | / |  |   |
|  | 27. vanillin                      |    | / |  |   |
|  | 28. vanillic acid                 |   | / |  |   |
|  | 29. syringic acid                 |  | / |  |   |
|  | 30. coniferyl aldehyde            |  | / |  |   |

|          |                               |                                                                                       |   |   |   |
|----------|-------------------------------|---------------------------------------------------------------------------------------|---|---|---|
|          | 31. syringin                  | 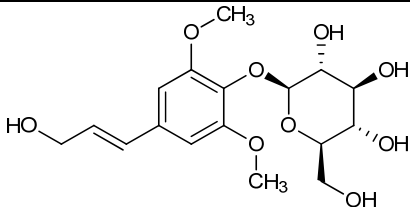   | / |   |   |
| steroids | 32. b-sitosterol              |    | / | / | / |
|          | 33. Stigmasterol              |    | / | / | / |
|          | 34. stigmasta-4,22-dien-3-one |  | / |   |   |

|                        |                   |                                                                                      |  |   |  |
|------------------------|-------------------|--------------------------------------------------------------------------------------|--|---|--|
| aliphatic<br>compounds | 35. palmitic acid | 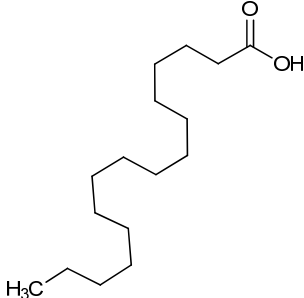  |  | / |  |
|                        | 36. stearic acid  |   |  | / |  |
|                        | 37. linoleic acid |  |  | / |  |

|              |                                                |                                                                                       |   |   |  |
|--------------|------------------------------------------------|---------------------------------------------------------------------------------------|---|---|--|
| chlorophylls | 38. pheophorbide a                             | 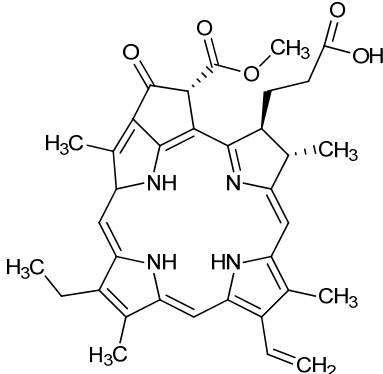   |   | / |  |
|              | 39. aristophyll-C                              |    |   | / |  |
| Polyprenols  | 40. ficaprenol                                 |   |   | / |  |
| coumarin     | 41. scopoletin                                 |  | / |   |  |
| quinol       | 42. 4-acetonyl-3,5-dimethoxy- <i>p</i> -quinol |  | / |   |  |
